# Supplementary material for: Viscoelastic Properties of Water-Absorbed Poly(methyl methacrylate) Doped with Lithium Salts with Various Anions
Source: MDPI journal article supplement (doi:10.3390/molecules27207114), 2022-10-21
Supplement: s1 [file s1]

## Supporting Information

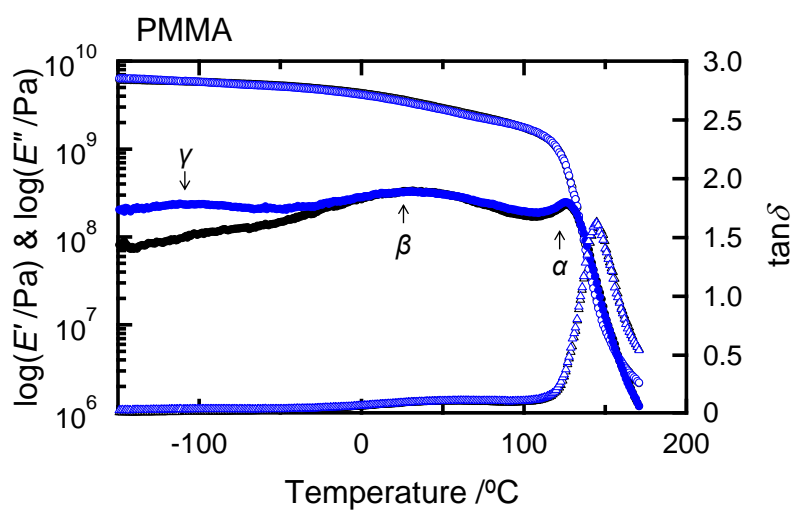

Figure S1. Temperature dependence of dynamic mechanical properties of PMMA.

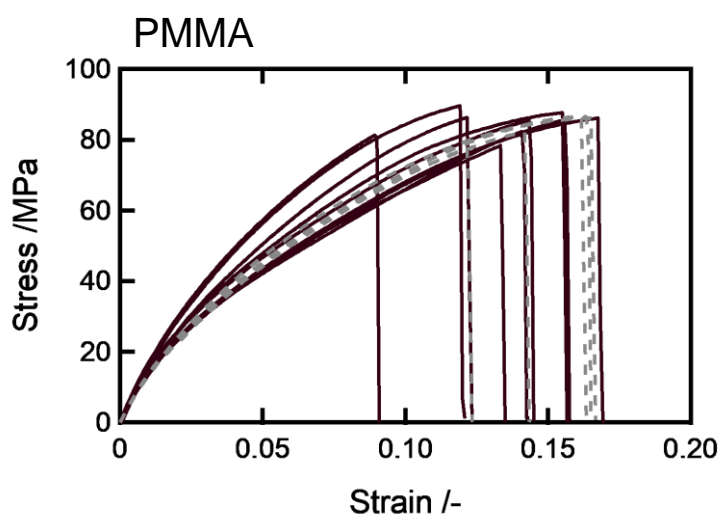

Figure S2. Stress-strain curves of dried and moisture pristine PMMA: dried (solid line) and moisture-absorbed (dashed line) samples.

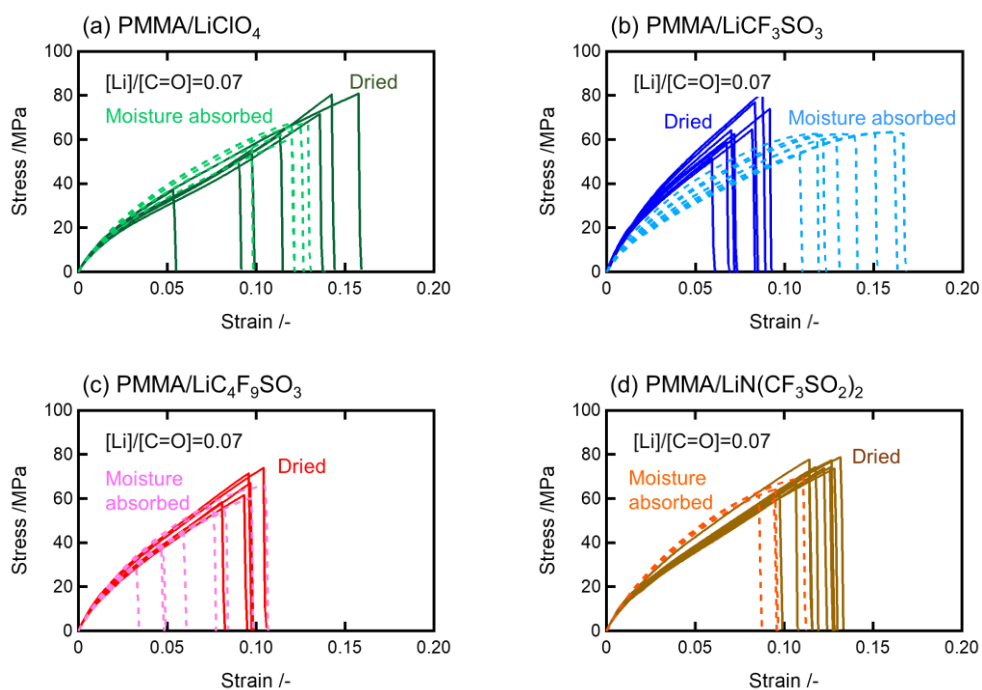

Figure S3. Stress-strain curves of dried and moisture PMMA/salt sheets with a 0.07 molar ratio salt concentration: dried (solid line) and moisture-absorbed (dashed line) samples.
